# Supplementary material for: FDCSP Is an Immune-Associated Prognostic Biomarker in HPV-Positive Head and Neck Squamous Carcinoma
Source: Biomolecules. 2022 Oct 12;12(10):1458. doi: 10.3390/biom12101458 (PMC9599724; doi:10.3390/biom12101458)
Supplement: Supplementary file 1 [file biomolecules-12-01458-s001.zip › biomolecules-1927813-supplmentary.pdf]

Supplementary Materials

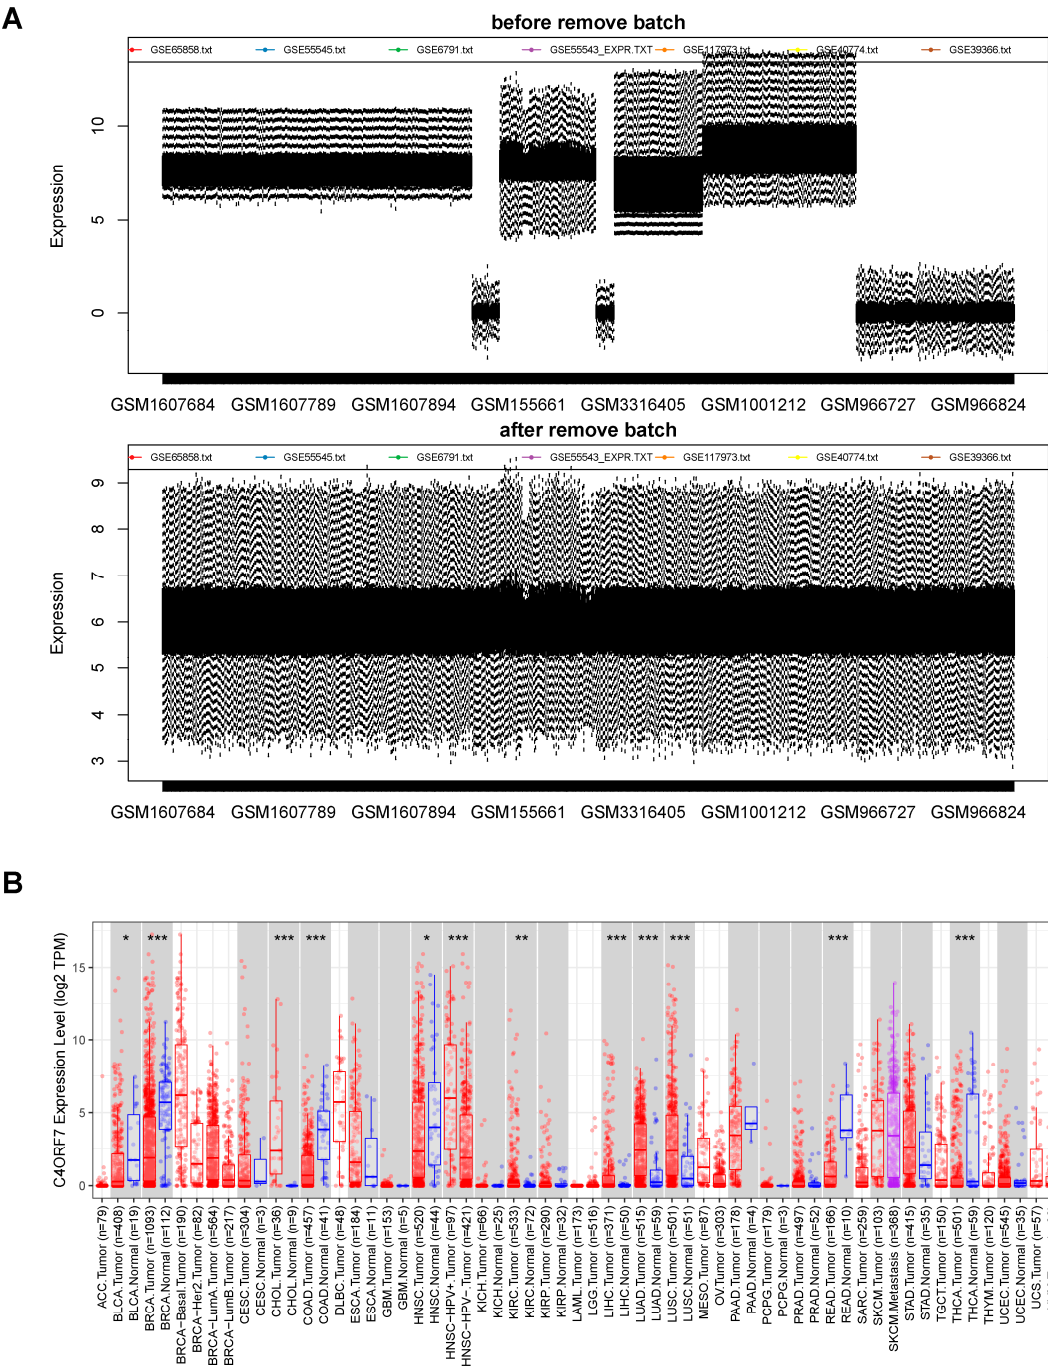

Figure S1. FDCSP expression and GEO cohorts merged.

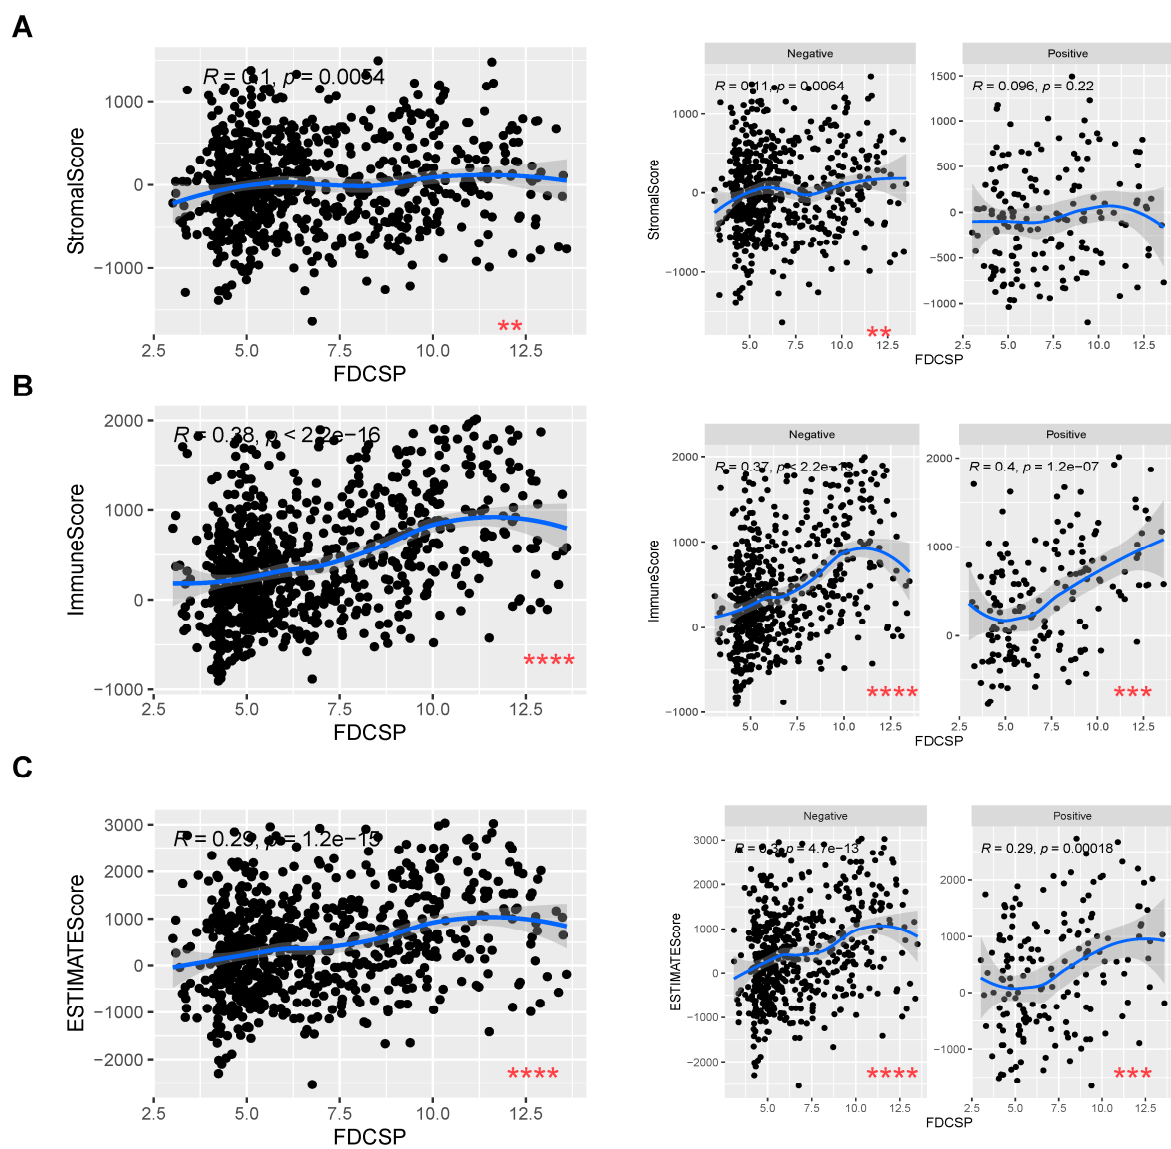

**Figure S2.** Immune infiltration score associated with FDCSP in HNSC (GEO cohorts).

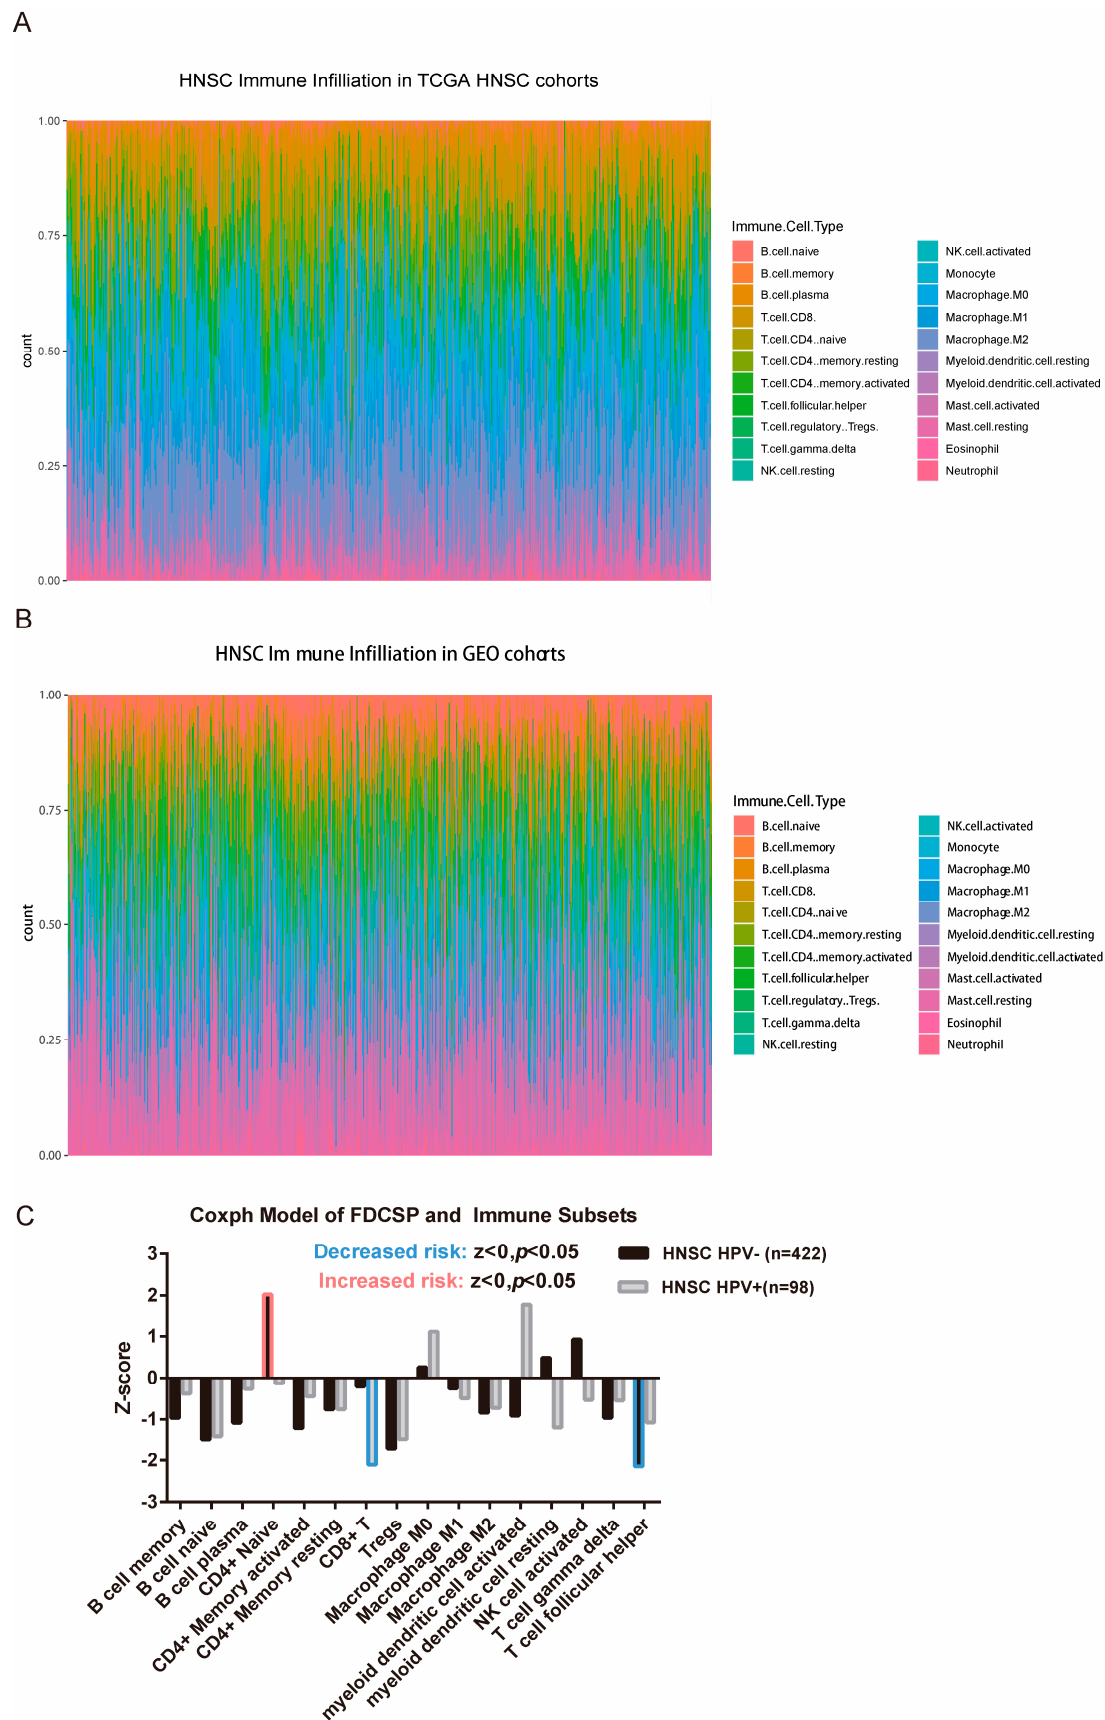

**Figure S3.** HNSC immune infiltration in TCGA and GEO cohorts.

A

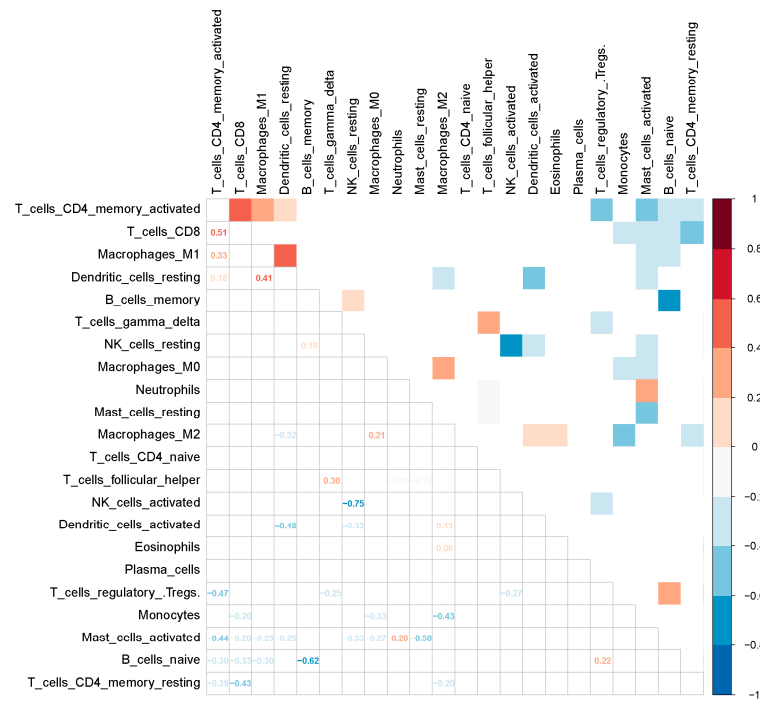

B

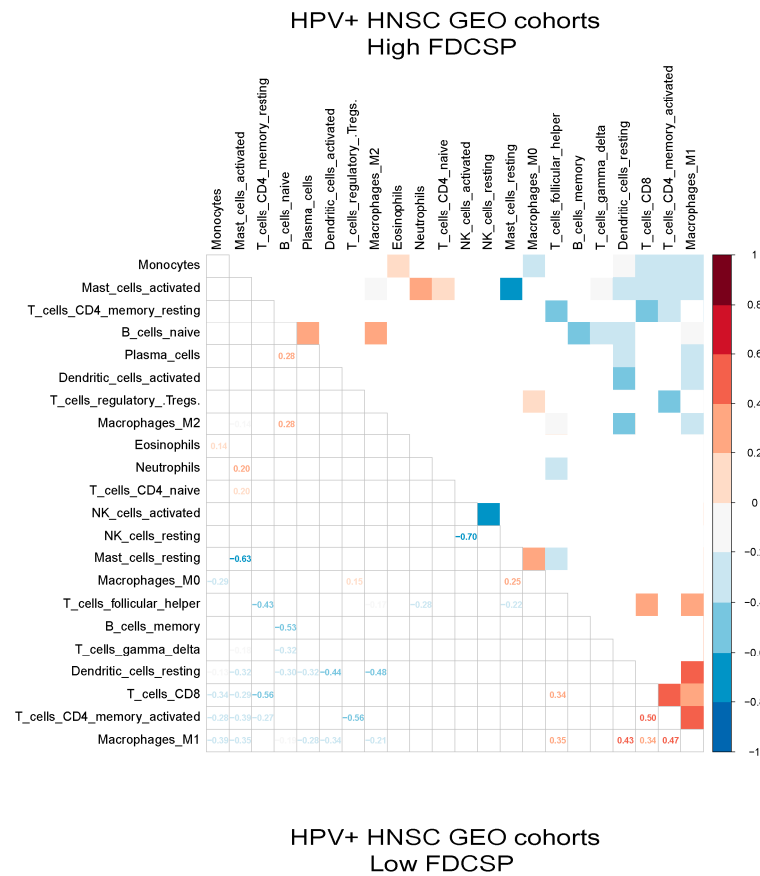

Figure S4. Immune cell correlation in the high/low FDCSP group of HPV+ HNSC (GEO cohorts).

A

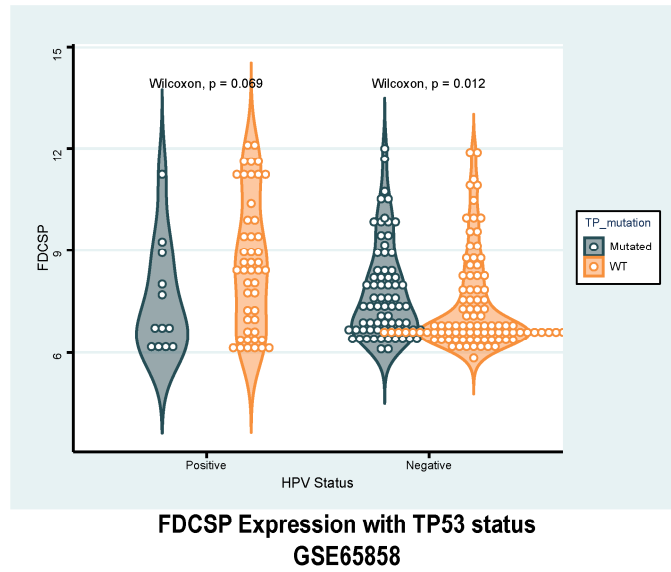

B

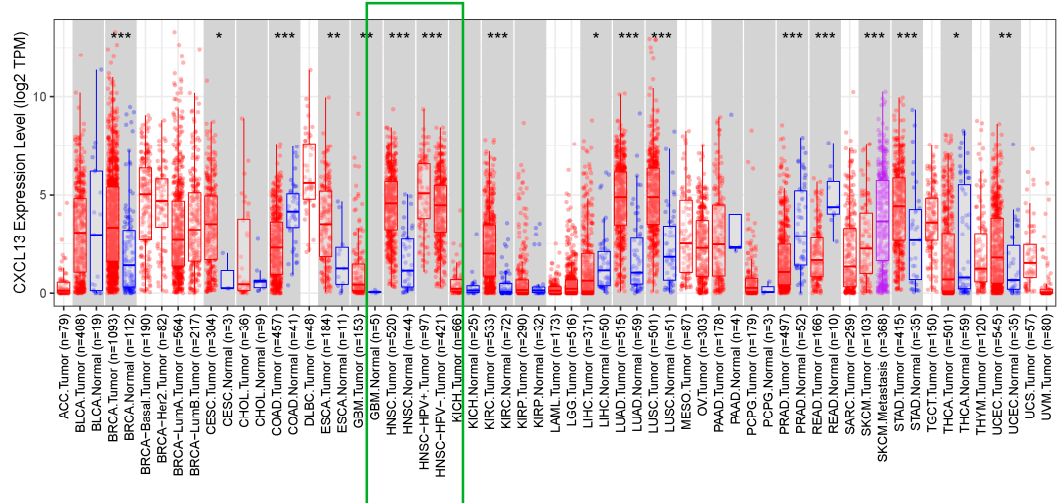

**Figure S5.** Expression of FDCSP in WT/Mutated TP53 in HPV+/- HNSC (GSE65858 cohort) and the expression of CXCL13 in HNSCs (TCGA, TIMER2.0).
